# Supplementary material for: Expanding the dimensionality of bis(tetrazolyl)alkane-based Fe(ii) coordination polymers by the application of dinitrile coligands
Source: Royal Society of Chemistry journal article supplement (doi:10.1039/d4dt00462k), 2024-01-01
Supplement: d4dt00462k1.pdf [file d4dt00462k1.pdf]

## Supporting Information

### Expanding dimensionality of bis(tetrazoly)alkane-based Fe(II) coordination polymers by an application of dinitrile coligands

Aleksandra Tołoczko,<sup>a</sup> Marcin Kaźmierczak,<sup>a</sup> Maria Książek,<sup>b</sup> Marek Weselski,<sup>a</sup> Miłosz Siczek,<sup>a</sup> Joachim Kusz,<sup>b</sup> Robert Bronisz<sup>a\*</sup>

<sup>a</sup> Faculty of Chemistry, University of Wrocław, F. Joliot-Curie 14, 50-383, Wrocław, Poland

<sup>b</sup> Institute of Physics, University of Silesia, 75 Pułku Piechoty 1, 41-500 Chorzów, Poland

**Table S1.** Crystallographic data for crystal structures of **1-5** determined at different temperatures.

**Table S2.** Fe-N distances, as well as selected Fe...Fe distances and torsional angles for **1** (ebtz/ADN) at 80 K and 250 K.

**Table S3.** Fe-N distances, as well as selected Fe...Fe distances and torsional angles for **2** (hbtz/ADN) at 80 K and 300 K.

**Table S4.** Fe-N distances, as well as selected Fe...Fe distances and torsional angles for **3** (1ditz/GLN) at 80 K and 200 K.

**Table S5.** Fe-N distances, as well as selected Fe...Fe distances and torsional angles for **4** (1ditz/SUN) at 100 K and 200 K.

**Table S6.** Selected C-H...N and C-H...F interatomic contacts [Å] and angles [°] for **1** (ebtz/ADN) at 80 K and 250 K.

**Table S7.** Selected C-H...N and C-H...F interatomic contacts [Å] and angles [°] for **2** (hbtz/ADN) at 80 K and 300 K.

**Table S8a.** Selected C-H...N and C-H...F interatomic contacts [Å] and angles [°] for **3** (1ditz/GLN) at 80 K and 200 K.

**Table S8b.** Amount of interatomic contacts for **3** (involving 1ditz and GLN as donor (DH) and acceptor (A)) at 80 K, 200 K related to the Fe1, Fe2, Fe3 and Fe4 surroundings.

**Table S9.** Selected C-H...N and C-H...F interatomic contacts [Å] and angles [°] for **4** (1ditz/SUN) at 100 K and 200 K.

**Figure S1.** FTIR spectrum of **1** (RT).

**Figure S2.** FTIR spectrum of **2** (RT).

**Figure S3.** FTIR spectrum of **3** (RT).

**Figure S4.** FTIR spectrum of **4** (RT).

**Figure S5.** Temperature dependence of average <Fe1-N>, <Fe2-N>, <Fe3-N> and <Fe4-N> distances.

**Table S1.** Crystallographic data for crystal structures of **1-4** determined at different temperatures.

|                                                         | 80 K<br>[1]<br>ebtz/ADN                                                         | 250 K<br>[1]<br>ebtz/ADN                                                        | 80 K<br>[2]<br>hbtz/ADN                                                         | 300 K<br>[2]<br>hbtz/ADN                                                        | 80 K<br>[3]<br>1ditz/GLN                                                                        | 200 K<br>[3]<br>1ditz/GLN                                                                       | 100 K<br>[4]<br>1ditz/SUN                                                       | 200 K<br>[4]<br>1ditz/SUN                                                       |
|---------------------------------------------------------|---------------------------------------------------------------------------------|---------------------------------------------------------------------------------|---------------------------------------------------------------------------------|---------------------------------------------------------------------------------|-------------------------------------------------------------------------------------------------|-------------------------------------------------------------------------------------------------|---------------------------------------------------------------------------------|---------------------------------------------------------------------------------|
| <b>CCDC number</b>                                      | 2332601                                                                         | 2332602                                                                         | 2332603                                                                         | 2332604                                                                         | 2332605                                                                                         | 2332606                                                                                         | 2332607                                                                         | 2332608                                                                         |
| <b>Chemical formula</b>                                 | C <sub>14</sub> H <sub>20</sub> B <sub>2</sub> F <sub>8</sub> FeN <sub>18</sub> | C <sub>14</sub> H <sub>20</sub> B <sub>2</sub> F <sub>8</sub> FeN <sub>18</sub> | C <sub>22</sub> H <sub>36</sub> B <sub>2</sub> F <sub>8</sub> FeN <sub>18</sub> | C <sub>22</sub> H <sub>36</sub> B <sub>2</sub> F <sub>8</sub> FeN <sub>18</sub> | C <sub>84</sub> H <sub>104</sub> B <sub>8</sub> F <sub>32</sub> Fe <sub>4</sub> N <sub>88</sub> | C <sub>84</sub> H <sub>104</sub> B <sub>8</sub> F <sub>32</sub> Fe <sub>4</sub> N <sub>88</sub> | C <sub>22</sub> H <sub>32</sub> B <sub>2</sub> F <sub>8</sub> FeN <sub>20</sub> | C <sub>22</sub> H <sub>32</sub> B <sub>2</sub> F <sub>8</sub> FeN <sub>20</sub> |
| <b>Formula mass</b>                                     | 669.95                                                                          | 669.95                                                                          | 782.16                                                                          | 782.16                                                                          | 3264.43                                                                                         | 3264.43                                                                                         | 806.14                                                                          | 806.14                                                                          |
| <b>Crystal system,<br/>space group</b>                  | triclinic<br><i>P</i> -1                                                                        | triclinic<br><i>P</i> -1                                                                        | monoclinic<br><i>P</i> 2 <sub>1</sub> / <i>c</i>                                | monoclinic<br><i>P</i> 2 <sub>1</sub> / <i>c</i>                                |
| <b>Z</b>                                                | 1                                                                               | 1                                                                               | 1                                                                               | 1                                                                               | 2                                                                                               | 2                                                                                               | 4                                                                               | 4                                                                               |
| <b><i>a</i> [Å]</b>                                     | 7.9876(3)                                                                       | 8.0729(6)                                                                       | 8.7981(15)                                                                      | 9.0817(13)                                                                      | 18.9389(4)                                                                                      | 19.0780(4)                                                                                      | 13.8300(3)                                                                      | 14.0436(4)                                                                      |
| <b><i>b</i> [Å]</b>                                     | 8.6965(3)                                                                       | 8.7297(7)                                                                       | 9.9945(19)                                                                      | 10.250(2)                                                                       | 19.4264(3)                                                                                      | 19.7385(3)                                                                                      | 13.8083(3)                                                                      | 14.0679(3)                                                                      |
| <b><i>c</i> [Å]</b>                                     | 10.1798(3)                                                                      | 10.3033(6)                                                                      | 11.413(2)                                                                       | 11.7285(19)                                                                     | 19.5685(3)                                                                                      | 19.8266(3)                                                                                      | 18.0906(4)                                                                      | 18.3229(5)                                                                      |
| <b><math>\alpha</math> [°]</b>                          | 90.210(3)                                                                       | 89.886(6)                                                                       | 109.557(18)                                                                     | 110.127(13)                                                                     | 90.0460(10)                                                                                     | 90.0320(10)                                                                                     | 90                                                                              | 90                                                                              |
| <b><math>\beta</math> [°]</b>                           | 91.318(3)                                                                       | 91.310(5)                                                                       | 99.300(16)                                                                      | 99.834(13)                                                                      | 104.760(2)                                                                                      | 104.745(2)                                                                                      | 94.9421(19)                                                                     | 94.555(3)                                                                       |
| <b><math>\gamma</math> [°]</b>                          | 110.791(3)                                                                      | 111.316(7)                                                                      | 112.580(17)                                                                     | 113.172(13)                                                                     | 103.591(2)                                                                                      | 103.643(2)                                                                                      | 90                                                                              | 90                                                                              |
| <b>V [Å<sup>3</sup>]</b>                                | 660.86(4)                                                                       | 676.25(9)                                                                       | 823.2(3)                                                                        | 881.1(3)                                                                        | 6752.9(2)                                                                                       | 7001.9(2)                                                                                       | 3441.90(12)                                                                     | 3608.53(16)                                                                     |
| <b>Absorption<br/>coefficient<br/>[mm<sup>-1</sup>]</b> | 0.672                                                                           | 0.657                                                                           | 0.552                                                                           | 0.516                                                                           | 0.545                                                                                           | 0.526                                                                                           | 0.532                                                                           | 0.508                                                                           |
| <b>No. of measured<br/>reflections</b>                  | 5551                                                                            | 5635                                                                            | 6790                                                                            | 8921                                                                            | 27531                                                                                           | 79839                                                                                           | 52164                                                                           | 54481                                                                           |
| <b>No. of independent<br/>reflections</b>               | 2685                                                                            | 2760                                                                            | 3363                                                                            | 4549                                                                            | 27531                                                                                           | 28534                                                                                           | 16003                                                                           | 16742                                                                           |
| <b>Theta range for<br/>data collection [°]</b>          | 2.978 to 26.366                                                                 | 3.181 to 26.372                                                                 | 3.202 to 26.369                                                                 | 3.335 to 28.699                                                                 | 1.768 to 26.372                                                                                 | 1.750 to 26.372                                                                                 | 2.983 to 36.488                                                                 | 3.103 to 36.526                                                                 |
| <b>Index ranges</b>                                     | -8 ≤ <i>h</i> ≤ 9<br>-10 ≤ <i>k</i> ≤ 10<br>-12 ≤ <i>l</i> ≤ 12                 | -9 ≤ <i>h</i> ≤ 10<br>-10 ≤ <i>k</i> ≤ 10<br>-12 ≤ <i>l</i> ≤ 12                | -8 ≤ <i>h</i> ≤ 10<br>-12 ≤ <i>k</i> ≤ 12<br>-14 ≤ <i>l</i> ≤ 14                | -12 ≤ <i>h</i> ≤ 12<br>-8 ≤ <i>k</i> ≤ 13<br>-15 ≤ <i>l</i> ≤ 15                | -23 ≤ <i>h</i> ≤ 22<br>-24 ≤ <i>k</i> ≤ 24<br>0 ≤ <i>l</i> ≤ 24                                 | -23 ≤ <i>h</i> ≤ 23<br>-24 ≤ <i>k</i> ≤ 24<br>-24 ≤ <i>l</i> ≤ 24                               | -23 ≤ <i>h</i> ≤ 22<br>-23 ≤ <i>k</i> ≤ 16<br>-27 ≤ <i>l</i> ≤ 29               | -23 ≤ <i>h</i> ≤ 23<br>-23 ≤ <i>k</i> ≤ 16<br>-28 ≤ <i>l</i> ≤ 29               |
| <b>R<sub>int</sub></b>                                  | 0.0166                                                                          | 0.0258                                                                          | 0.0275                                                                          | 0.0285                                                                          | 0.0492                                                                                          | 0.0493                                                                                          | 0.0389                                                                          | 0.0424                                                                          |

|                                                                           |                  |                  |                  |                  |                  |                  |                  |                  |
|---------------------------------------------------------------------------|------------------|------------------|------------------|------------------|------------------|------------------|------------------|------------------|
| <b>Final <math>R_I</math> values (<math>I &gt; 2\sigma(I)</math>)</b>     | 0.0244           | 0.0355           | 0.0355           | 0.0493           | 0.0687           | 0.0928           | 0.0472           | 0.0500           |
| <b>Final <math>wR(F^2)</math> values (<math>I &gt; 2\sigma(I)</math>)</b> | 0.0591           | 0.0904           | 0.0862           | 0.1243           | 0.1691           | 0.2338           | 0.1079           | 0.1150           |
| <b>Final <math>R_I</math> values (all data)</b>                           | 0.0273           | 0.0409           | 0.0456           | 0.0689           | 0.0954           | 0.1280           | 0.0717           | 0.1010           |
| <b>Final <math>wR(F^2)</math> values (all data)</b>                       | 0.0606           | 0.0954           | 0.0912           | 0.1387           | 0.1815           | 0.2531           | 0.1251           | 0.1463           |
| <b>Goodness-of-fit on <math>F^2</math></b>                                | 1.048            | 1.056            | 1.041            | 1.023            | 1.026            | 1.053            | 1.036            | 1.017            |
| <b>Largest diff. peak and hole [<math>e\text{\AA}^{-3}</math>]</b>        | 0.372 and -0.234 | 0.367 and -0.503 | 0.482 and -0.262 | 0.382 and -0.336 | 1.318 and -0.675 | 1.346 and -1.311 | 1.103 and -0.908 | 0.505 and -0.701 |

**Table S2.** Fe-N distances, as well as selected Fe...Fe distances and torsional angles for **1** (ebtz/ADN) at 80 K and 240 K.

|                                            | <b>80 K</b><br><b>[1]</b><br><b>ebtz/ADN</b> | <b>250 K</b><br><b>[1]</b><br><b>ebtz/ADN</b> |
|--------------------------------------------|----------------------------------------------|-----------------------------------------------|
| Fe1-N4 [Å]                                 | 2.1584(12)                                   | 2.1680(15)                                    |
| Fe1-N8 [Å]                                 | 2.1908(12)                                   | 2.1983(16)                                    |
| Fe1-N9 [Å]                                 | 2.1568(12)                                   | 2.1681(15)                                    |
| Fe1-ebtz-Fe1 <sup>a</sup> [Å]              | 8.6965(3)                                    | 8.7297(7)                                     |
| Fe1-ADN-Fe1 <sup>b</sup> [Å]               | 10.1798(3)                                   | 10.3033(6)                                    |
| Fe1...Fe1 <sup>c</sup> [Å]                 | 9.4930(4)                                    | 9.4944(10)                                    |
| Fe1...Fe1 <sup>d</sup> [Å]                 | 7.9876(2)                                    | 8.0729(6)                                     |
| Fe1...Fe1 <sup>e</sup> [Å]                 | 13.3644(4)                                   | 13.5175(9)                                    |
| Fe1...Fe1 <sup>f</sup> [Å]                 | 13.4130(4)                                   | 13.4910(9)                                    |
| Fe1-N9-C5 [°]                              | 160.91(11)                                   | 161.76(15)                                    |
| C5-C6-C7-C7 <sup>g</sup> [°]               | 59.87(19)                                    | 60.8(4)                                       |
| N1-N2-C3-C4 [°]                            | -74.74(16)                                   | -75.8(2)                                      |
| N3-N2-C3-C4 [°]                            | 100.55(15)                                   | 101.3(2)                                      |
| N2-C3-C4-N6 <sup>h</sup> [°]               | 66.90(15)                                    | 67.6(2)                                       |
| C3-C4-N6 <sup>h</sup> -N5 <sup>h</sup> [°] | 62.83(17)                                    | 62.8(2)                                       |
| C3-C4-N6 <sup>h</sup> -N7 <sup>h</sup> [°] | -120.67(14)                                  | -120.01(19)                                   |

<sup>a</sup> 1-x, 1-y, 1-z; <sup>b</sup> x, y, 1+z; <sup>c</sup> 2-x, 1-y, 1-z; <sup>d</sup> 1+x, y, z; <sup>e</sup> 1-x, -1-y, -z; <sup>f</sup> 1-x, 1-y, -z; <sup>g</sup> 1-x, -y, -z; <sup>h</sup> x, -1+y, z; <sup>i</sup> x, 1+y, z.

**Table S3.** Fe-N distances, as well as selected Fe...Fe distances and torsional angles for **2** (hbtz/ADN) at 80 K and 300 K.

|                                   | <b>80 K</b><br><b>[2]</b><br><b>hbtz/ADN</b> | <b>300 K</b><br><b>[2]</b><br><b>hbtz/ADN</b> |
|-----------------------------------|----------------------------------------------|-----------------------------------------------|
| Fe1-N4 [Å]                        | 1.9660(18)                                   | 2.1564(19)                                    |
| Fe1-N8 [Å]                        | 1.9796(16)                                   | 2.1702(17)                                    |
| Fe1-N9 [Å]                        | 1.9216(17)                                   | 2.1200(19)                                    |
| Fe1-hbtz-Fe1 <sup>a</sup> [Å]     | 11.413(2)                                    | 11.7285(19)                                   |
| Fe1-hbtz-Fe1 <sup>b</sup> [Å]     | 12.401(3)                                    | 12.645(3)                                     |
| Fe1-ADN-Fe1 <sup>c</sup> [Å]      | 10.477(3)                                    | 10.690(2)                                     |
| Fe1...Fe1 <sup>d</sup> [Å]        | 8.7981(15)                                   | 9.0817(13)                                    |
| Fe1...Fe1 <sup>e</sup> [Å]        | 9.9945(19)                                   | 10.250(2)                                     |
| Fe1...Fe1 <sup>f</sup> [Å]        | 11.455(5)                                    | 11.521(4)                                     |
| Fe1...Fe1 <sup>g</sup> [Å]        | 16.941(6)                                    | 17.086(5)                                     |
| Fe1-N9-C9 [°]                     | 176.3(3)                                     | 177.82(19)                                    |
| C9-C10-C11-C11 <sup>h</sup> [°]   | -61.2(3)                                     | -62.0(7)                                      |
| C9-C10-C11A-C11A <sup>h</sup> [°] | -                                            | 62.2(9)                                       |
| N1-N2-C2-C3 [°]                   | -66.3(2)                                     | -66.1(4)                                      |
| N3-N2-C2-C3 [°]                   | 109.3(2)                                     | 109.5(3)                                      |
| N2-C2-C3-C4 [°]                   | -56.3(2)                                     | -55.6(4)                                      |
| N2-C2-C3-C4A [°]                  | -                                            | -68.9(9)                                      |
| N5-N6-C6-C7 [°]                   | 73.7(2)                                      | 73.4(3)                                       |
| N7-N6-C6-C7 [°]                   | -100.3(2)                                    | -101.1(3)                                     |
| N6-C6-C7-C8 [°]                   | 61.5(2)                                      | 63.1(4)                                       |

<sup>a</sup> x, y, 1+z; <sup>b</sup> x, 1+y, 1+z; <sup>c</sup> 1+x, 1+y, z; <sup>d</sup> 1-x, -y, 1-z; <sup>e</sup> x, 1+y, z; <sup>f</sup> 1+x, 1+y, 1+z; <sup>g</sup> 1+x, 2+y, 1+z; <sup>h</sup> 1-x, 1-y, 1-z.

**Table S4.** Fe-N distances, as well as selected Fe...Fe distances and torsional angles for **3** (1ditz/GLN) at 80 K and 200 K.

|                                | <b>80 K</b><br><b>[3]</b><br><b>1ditz/GLN</b> | <b>200 K</b><br><b>[3]</b><br><b>1ditz/GLN</b> |
|--------------------------------|-----------------------------------------------|------------------------------------------------|
| Fe1-N4 [Å]                     | 2.046(4)                                      | 2.176(5)                                       |
| Fe1-N12 [Å]                    | 2.028(4)                                      | 2.170(5)                                       |
| Fe1-N20 [Å]                    | 2.032(4)                                      | 2.160(5)                                       |
| Fe1-N28 [Å]                    | 2.043(4)                                      | 2.187(5)                                       |
| Fe1-N33 [Å]                    | 2.001(4)                                      | 2.173(6)                                       |
| Fe1-N35 [Å]                    | 2.002(5)                                      | 2.174(5)                                       |
| Fe2-N8 <sup>a</sup> [Å]        | 2.039(4)                                      | 2.178(5)                                       |
| Fe2-N32 [Å]                    | 2.048(4)                                      | 2.173(5)                                       |
| Fe2-N40 [Å]                    | 2.030(4)                                      | 2.170(5)                                       |
| Fe2-N48 [Å]                    | 2.023(4)                                      | 2.161(5)                                       |
| Fe2-N53 [Å]                    | 1.988(4)                                      | 2.169(5)                                       |
| Fe2-N55 [Å]                    | 1.965(4)                                      | 2.144(5)                                       |
| Fe3-N44 [Å]                    | 2.067(4)                                      | 2.185(5)                                       |
| Fe3-N52 <sup>b</sup> [Å]       | 2.079(4)                                      | 2.188(5)                                       |
| Fe3-N60 [Å]                    | 2.061(4)                                      | 2.168(5)                                       |
| Fe3-N68 [Å]                    | 2.070(4)                                      | 2.189(5)                                       |
| Fe3-N73 [Å]                    | 2.023(4)                                      | 2.151(5)                                       |
| Fe3-N75 [Å]                    | 2.016(4)                                      | 2.158(6)                                       |
| Fe4-N16 <sup>a</sup> [Å]       | 2.170(4)                                      | 2.193(5)                                       |
| Fe4-N24 <sup>c</sup> [Å]       | 2.161(4)                                      | 2.188(5)                                       |
| Fe4-N64 <sup>a</sup> [Å]       | 2.158(4)                                      | 2.193(5)                                       |
| Fe4-N72 [Å]                    | 2.158(4)                                      | 2.169(5)                                       |
| Fe4-N77 [Å]                    | 2.136(4)                                      | 2.146(5)                                       |
| Fe4-N79 [Å]                    | 2.153(4)                                      | 2.176(6)                                       |
|                                |                                               |                                                |
| Fe1-1ditz-Fe2 [Å]              | 9.8108(9)                                     | 9.9448(11)                                     |
| Fe1-1ditz-Fe2 <sup>d</sup> [Å] | 9.7666(9)                                     | 9.8865(11)                                     |
| Fe1-1ditz-Fe4 <sup>d</sup> [Å] | 9.6251(9)                                     | 9.7577(10)                                     |
| Fe1-1ditz-Fe4 <sup>e</sup> [Å] | 9.8030(9)                                     | 9.9870(10)                                     |
| Fe2-1ditz-Fe3 [Å]              | 9.7937(8)                                     | 9.9573(10)                                     |
| Fe2-1ditz-Fe3 <sup>f</sup> [Å] | 9.6341(9)                                     | 9.7848(10)                                     |
| Fe2-1ditz-Fe1 <sup>a</sup> [Å] | 9.7666(9)                                     | 9.8865(11)                                     |
| Fe3-1ditz-Fe4 [Å]              | 9.8171(9)                                     | 9.9583(12)                                     |
| Fe3-1ditz-Fe4 <sup>d</sup> [Å] | 9.7531(9)                                     | 9.8683(11)                                     |
|                                |                                               |                                                |
| Fe1...Fe4 [Å]                  | 21.8334(9)                                    | 22.1980(11)                                    |
| Fe1...Fe1 <sup>a</sup> [Å]     | 19.5685(3)                                    | 19.8266(2)                                     |
| Fe1...Fe3 [Å]                  | 13.6397(9)                                    | 13.9456(11)                                    |
| Fe1...Fe3 <sup>e</sup> [Å]     | 13.9487(9)                                    | 14.0433(11)                                    |
| Fe1...Fe3 <sup>f</sup> [Å]     | 13.9224(9)                                    | 14.1223(11)                                    |
| Fe2...Fe4 [Å]                  | 13.9327(9)                                    | 14.1212(11)                                    |
| Fe2...Fe4 <sup>e</sup> [Å]     | 13.6538(9)                                    | 13.8665(11)                                    |
| Fe2...Fe4 <sup>f</sup> [Å]     | 13.6410(9)                                    | 13.9690(11)                                    |
|                                |                                               |                                                |
| Fe1-N33-C13 [°]                | 172.7(4)                                      | 170.5(5)                                       |
| Fe1-N35-C18 [°]                | 176.0(4)                                      | 172.9(6)                                       |
| Fe2-N53-C29 [°]                | 173.2(4)                                      | 168.8(5)                                       |

|                           |          |          |
|---------------------------|----------|----------|
| Fe2-N55-C34 [°]           | 173.0(4) | 168.2(6) |
| Fe3-N73-C45 [°]           | 160.3(4) | 155.0(5) |
| Fe3-N75-C50 [°]           | 167.2(4) | 165.3(5) |
| Fe4-N77-C55 [°]           | 149.4(4) | 154.8(5) |
| Fe4-N79-C60 [°]           | 170.7(4) | 167.2(6) |
|                           |          |          |
| $\Sigma_{\text{Fe1}}$ [°] | 6.2      | 10.8     |
| $\Sigma_{\text{Fe2}}$ [°] | 7.9      | 11.0     |
| $\Sigma_{\text{Fe3}}$ [°] | 18.1     | 19.9     |
| $\Sigma_{\text{Fe4}}$ [°] | 12.2     | 13.5     |

<sup>a</sup> x,y,1+z; <sup>b</sup> x,-1+y,z; <sup>c</sup> x,-1+y,1+z; <sup>d</sup> x,y,-1+z; <sup>e</sup> x, 1+y, -1+z; <sup>f</sup> x, 1+y, z

**Table S5.** Fe-N distances, as well as selected Fe...Fe distances and torsional angles for **4** (1ditz/SUN) at 100 K and 200 K.

|                                              | <b>100 K</b><br><b>[4]</b><br><b>1ditz/SUN</b> | <b>200 K</b><br><b>[4]</b><br><b>1ditz/SUN</b> |
|----------------------------------------------|------------------------------------------------|------------------------------------------------|
| Fe1-N4 [Å]                                   | 1.9954(11)                                     | 2.1667(12)                                     |
| Fe1-N8 [Å]                                   | 1.9997(11)                                     | 2.1723(13)                                     |
| Fe1-N12 [Å]                                  | 2.0004(11)                                     | 2.1731(13)                                     |
| Fe1-N16 [Å]                                  | 1.9995(11)                                     | 2.1709(13)                                     |
| Fe1-N17 [Å]                                  | 1.9371(12)                                     | 2.1599(14)                                     |
| Fe1-N18 [Å]                                  | 1.9351(12)                                     | 2.1370(14)                                     |
| Fe1-1ditz-Fe1 <sup>a</sup> [Å]               | 9.7422(3)                                      | 9.9124(3)                                      |
| Fe1-1ditz-Fe1 <sup>b</sup> [Å]               | 9.8015(3)                                      | 9.9661(3)                                      |
| Fe1-SUN-Fe1 <sup>c</sup> [Å]                 | 11.9229(4)                                     | 12.2279(5)                                     |
| Fe1-SUN-Fe1 <sup>d</sup> [Å]                 | 11.8685(4)                                     | 12.1574(5)                                     |
| Fe1...Fe1 <sup>e</sup> [Å]                   | 9.2963(2)                                      | 9.3711(3)                                      |
| Fe1...Fe1 <sup>f</sup> [Å]                   | 13.8300(3)                                     | 14.0436(4)                                     |
| Fe1...Fe1 <sup>g</sup> [Å]                   | 13.8083(3)                                     | 14.0679(3)                                     |
| Fe1...Fe1 <sup>h</sup> [Å]                   | 14.7593(4)                                     | 15.1746(4)                                     |
| Fe1...Fe1 <sup>i</sup> [Å]                   | 16.0042(3)                                     | 16.2667(5)                                     |
| Fe1...Fe1 <sup>j</sup> [Å]                   | 19.5432(3)                                     | 19.8779(3)                                     |
| Fe1...Fe1 <sup>k</sup> [Å]                   | 19.6863(4)                                     | 20.1756(5)                                     |
| Fe1-N17-C7 [°]                               | 177.01(11)                                     | 172.84(13)                                     |
| Fe1-N18-C11 [°]                              | 172.61(11)                                     | 173.16(13)                                     |
| C7-C8-C9-C10 [°]                             | -65.34(16)                                     | -65.1(2)                                       |
| C8-C9-C10-C10 <sup>d</sup> [°]               | -178.97(14)                                    | -179.37(18)                                    |
| C11-C12-C13-C14 [°]                          | -61.42(17)                                     | -61.8(2)                                       |
| C12-C13-C14-C14 <sup>c</sup> [°]             | -173.21(15)                                    | -174.30(17)                                    |
| N1-C3-N5 <sup>m</sup> -N6 <sup>m</sup> [°]   | -74.54(17)                                     | -99(2)                                         |
| N1-C3-N5 <sup>m</sup> -C2 <sup>m</sup> [°]   | 110.49(16)                                     | 99.5(2)                                        |
| C1-N1-C3-N5 <sup>m</sup> [°]                 | 102.63(16)                                     | 98.78(19)                                      |
| N2-N1-C3-N5 <sup>m</sup> [°]                 | -78.71(16)                                     | -83.17(19)                                     |
| N9-C6-N13 <sup>a</sup> -N14 <sup>a</sup> [°] | 95.42(16)                                      | 98.30(19)                                      |
| N9-C6-N13 <sup>a</sup> -C5 <sup>a</sup> [°]  | -91.33(17)                                     | -88.0(2)                                       |
| C4-N9-C6-N13 <sup>a</sup> [°]                | -97.41(17)                                     | -90.9(2)                                       |
| N10-N9-C6-N13 <sup>a</sup> [°]               | 88.50(16)                                      | 88.0(7)                                        |

<sup>a</sup> 2-x, -1/2+y, 1/2-z; <sup>b</sup> 1-x, -1/2+y, 1/2-z; <sup>c</sup> 2-x, -y, 1-z; <sup>d</sup> 1-x, -y, -z; <sup>e</sup> x, 1/2-y, 1/2+z; <sup>f</sup> 1+x, y, z; <sup>g</sup> x, -1+y, z; <sup>h</sup> x, -1/2-y, 1/2+z; <sup>i</sup> 1+x, 1/2-y, 1/2+z; <sup>j</sup> -1+x, -1+y, z; <sup>k</sup> 1+x, -1/2-y, 1/2+z; <sup>l</sup> 1+x, -1+y, z; <sup>m</sup> 1-x, 1/2+y, 1/2-z.

**Table S6.** Selected C-H...N and C-H...F interatomic contacts [ $\text{\AA}$ ] and angles [ $^\circ$ ] for **1** (ebtz/ADN) at 80 K and 250 K. D-H...A distances longer than 3.5  $\text{\AA}$  and angles lesser than 110 $^\circ$  were included only for facilitate comparison of changes.

|                          | 80 K<br>[1]<br>ebtz/ADN |       | 250 K<br>[1]<br>ebtz/ADN |       |
|--------------------------|-------------------------|-------|--------------------------|-------|
|                          | d(D..A)                 | <DHA  | d(D..A)                  | <DHA  |
| C1-H1...F2 <sup>a</sup>  | 3.0534(16)              | 121.0 | 3.059(2)                 | 123.1 |
| C2-H2...F2 <sup>b</sup>  | 3.1360(17)              | 147.4 | 3.155(3)                 | 144.2 |
| C3-H3A...F4 <sup>c</sup> | 3.3666(17)              | 134.2 | 3.438(3)                 | 134.3 |
| C3-H3B...F4 <sup>b</sup> | 3.2737(17)              | 129.9 | 3.333(3)                 | 129.2 |
| C4-H4A...F1 <sup>c</sup> | 3.2985(17)              | 161.4 | 3.351(3)                 | 160.6 |
| C4-H4A...F3 <sup>c</sup> | 3.2166(17)              | 128.8 | 3.249(3)                 | 131.6 |
| C4-H4B...F1 <sup>d</sup> | 3.2474(17)              | 163.1 | 3.295(3)                 | 163.8 |
| C4-H4B...F4 <sup>d</sup> | 3.4953(17)              | 142.4 | 3.541(3)                 | 143.3 |
| C6-H6B...F3 <sup>e</sup> | 3.1547(16)              | 128.2 | -                        | -     |
| C6-H6D...F3 <sup>e</sup> | -                       | -     | 3.177(2)                 | 141.2 |
| C6-H6C...F1 <sup>d</sup> | -                       | -     | 3.242(3)                 | 131.5 |

<sup>a</sup> 1-x, -y, 1-z; <sup>b</sup> -1+x, -1+y, z; <sup>c</sup> 1-x, -y, -z; <sup>d</sup> x, -1+y, z; <sup>e</sup> 2-x, 1-y, -z.

**Table S7.** Selected C-H...N and C-H...F interatomic contacts [ $\text{\AA}$ ] and angles [ $^\circ$ ] for **2** (hbtz/ADN) at 80 K and 300 K. D-H...A distances longer than 3.5  $\text{\AA}$  and angles lesser than 110 $^\circ$  were included only for facilitate comparison of changes.

|                            | 80 K<br>[2]<br>hbtz/ADN |       | 300 K<br>[2]<br>hbtz/ADN |       |
|----------------------------|-------------------------|-------|--------------------------|-------|
|                            | d(D..A)                 | <DHA  | d(D..A)                  | <DHA  |
| C1-H1...F4 <sup>a</sup>    | 3.010(2)                | 158.7 | 3.050(7)                 | 166.9 |
| C2-H2A...F1 <sup>b</sup>   | 3.294(3)                | 175.8 | 3.366(8)                 | 176.4 |
| C2-H2B...F3 <sup>c</sup>   | 3.244(3)                | 119.0 | 3.427(4)                 | 125.5 |
| C2-H2B...F4 <sup>c</sup>   | 3.359(3)                | 140.3 | 3.483(8)                 | 152.5 |
| C4-H4B...F1 <sup>d</sup>   | 3.468(3)                | 143.2 | -                        | -     |
| C5-H5...F2 <sup>e</sup>    | 3.195(3)                | 143.8 | 3.508(8)                 | 148.9 |
| C5-H5...F3 <sup>e</sup>    | 3.260(3)                | 146.0 | 3.331(4)                 | 152.1 |
| C5-H5...N3 <sup>f</sup>    | 3.283(3)                | 118.8 | 3.553(3)                 | 118.3 |
| C6-H6A...N2 <sup>g</sup>   | 3.416(3)                | 136.6 | 3.596(3)                 | 136.0 |
| C6-H6B...F3                | 3.215(3)                | 119.5 | 3.534(5)                 | 121.3 |
| C8-H8A...F1 <sup>d</sup>   | 3.241(3)                | 121.0 | 3.340(7)                 | 127.9 |
| C10-H10A...F2 <sup>h</sup> | 3.424(3)                | 150.2 | -                        | -     |
| C11-H11A...F4              | 3.241(3)                | 122.9 | -                        | -     |

<sup>a</sup> -1+x, -1+y, z; <sup>b</sup> -1+x, y, z; <sup>c</sup> -x, -y, -z; <sup>d</sup> 1-x, -y, -z; <sup>e</sup> 1-x, -y, 1-z; <sup>f</sup> -x, -y, 1-z; <sup>g</sup> 1+x, y, z; <sup>h</sup> 1-x, 1-y, 1-z.

**Table S8a.** Selected C-H...N and C-H...F interatomic contacts [Å] and angles [°] for **3** (1ditz/GLN) at 80 K and 200 K. D-H...A distances longer than 3.5 Å and angles lesser than 110° were included only for facilitate comparison of changes.

| Fe1                                                     | 80 K     |       | 200 K     |       | Fe3                                                        | 80 K      |       | 200 K     |       |
|---------------------------------------------------------|----------|-------|-----------|-------|------------------------------------------------------------|-----------|-------|-----------|-------|
|                                                         | d(D...A) | <DHA  | d(D...A)  | <DHA  |                                                            | d(D...A)  | <DHA  | d(D...A)  | <DHA  |
| <b>Donor – tetrazole ring linked to Fe1</b>             |          |       |           |       | <b>Donor – tetrazole ring linked to Fe3</b>                |           |       |           |       |
| C1-H1...N56 <sup>b</sup> (dinitrile coordinated to Fe2) | 3.786(9) | 126.2 | 3.480(2)  | 136.6 | C24-H24...N34 <sup>a</sup> (dinitrile coordinated to Fe1)  | 3.465(7)  | 133.7 | 3.391(12) | 135.7 |
| C4-H4...N78 <sup>a</sup> (dinitrile coordinated to Fe4) | 3.256(7) | 139.0 | 3.327(10) | 141.0 | C42-H42...N36 <sup>f</sup> (dinitrile coordinated to Fe1)  | 3.323(7)  | 154.3 | 3.319(11) | 158.5 |
| C7-H7...N82 <sup>b</sup> (noncoordinated dinitrile)     | 3.208(7) | 161.0 | 3.253(11) | 166.4 | C27-H27...N81 <sup>b</sup> (noncoordinated dinitrile)      | 3.267(7)  | 155.7 | 3.333(11) | 154.0 |
| C10-H10...N83 <sup>f</sup> (noncoordinated dinitrile)   | 3.246(7) | 153.5 | 3.316(11) | 156.6 | C39-H39...N84 <sup>f</sup> (noncoordinated dinitrile)      | 3.212(7)  | 162.1 | 3.267(11) | 163.6 |
| <b>Donor - dinitrile coordinated to Fe1</b>             |          |       |           |       | <b>Donor - dinitrile coordinated to Fe3</b>                |           |       |           |       |
| C14-H14A...N66 <sup>a</sup> (Tz coordinated to Fe3)     | 3.504(7) | 137.8 | 3.474(9)  | 135.9 | C41-H41B...N76 <sup>f</sup> (dinitrile coordinated to Fe3) | 3.346(8)  | 163.8 | 3.410(3)  | 150.3 |
| C19-H19B...N46 <sup>b</sup> (Tz coordinated to Fe2)     | 3.629(8) | 128.4 | 3.499(12) | 141.0 | C46-H46B...N30 <sup>a</sup> (Tz coordinated to Fe2)        | 3.111(6)  | 116.9 | 3.165(9)  | 126.8 |
| C19-H19A...N81 (noncoordinated dinitrile)               | 3.283(9) | 121.0 | 3.338(16) | 116.3 | C48-H48A...N51 <sup>k</sup> (Tz coordinated to Fe3)        | 3.455(7)  | 135.6 | 3.503(11) | 135.6 |
| C19-H19B...N82 <sup>b</sup> (noncoordinated dinitrile)  | 3.377(9) | 133.3 | 3.516(16) | 125.4 | C51-H51B...N10 <sup>f</sup> (Tz coordinated to Fe1)        | 3.245(7)  | 122.3 | 3.376(11) | 136.6 |
| C15-H15B...F22A                                         | -        | -     | 3.25(4)   | 155.9 | C51-H51B...N11 <sup>f</sup> (Tz coordinated to Fe1)        | 3.116(7)  | 101.7 | 3.166(10) | 114.7 |
| C21-H21A...F4                                           | 3.266(9) | 148.7 | 3.75(3)   | 142.0 | C52-H52B...N10 <sup>f</sup> (Tz coordinated to Fe1)        | 3.391(8)  | 129.1 | 3.422(18) | 127.6 |
|                                                         |          |       |           |       | C52-H52B...N11 <sup>f</sup> (Tz coordinated to Fe1)        | 3.391(8)  | 118.6 | 3.375(18) | 126.3 |
|                                                         |          |       |           |       | C46-H46B...N83 <sup>j</sup> (noncoordinated dinitrile)     | 3.209(7)  | 131.3 | 3.209(12) | 127.7 |
|                                                         |          |       |           |       | C51-H51A...N81 <sup>f</sup> (noncoordinated dinitrile)     | 3.412(8)  | 128.6 | 3.410(14) | 134.7 |
|                                                         |          |       |           |       | C41-H41A...F18                                             | 3.303(13) | 139.4 | 3.224(11) | 132.2 |
|                                                         |          |       |           |       | C47-H47B...F10a                                            | 3.434(7)  | 167.3 | 3.461(13) | 172.3 |
|                                                         |          |       |           |       | C48-H48A...F26                                             | 3.458(6)  | 141.3 | 3.718(14) | 144.1 |

| Donor - CH <sub>2</sub> from 1ditz bridging Fe1 and Fe2    | 80 K      |       | 200 K     |       | Donor - CH <sub>2</sub> from 1ditz bridging Fe3 and Fe2    | 80 K     |       | 200 K     |       |
|------------------------------------------------------------|-----------|-------|-----------|-------|------------------------------------------------------------|----------|-------|-----------|-------|
|                                                            | d(D...A)  | <DHA  | d(D...A)  | <DHA  |                                                            | d(D...A) | <DHA  | d(D...A)  | <DHA  |
| C3-H3A...N56 <sup>b</sup> (dinitrile coordinated to Fe2)   | 3.231(8)  | 159.6 | 3.420(2)  | 144.1 | C25-H25D...N34 <sup>a</sup> (dinitrile coordinated to Fe1) | 3.340(8) | 135.8 | 3.365(12) | 135.3 |
| C3-H3A...N56A <sup>b</sup> ((dinitrile coordinated to Fe2) | -         | -     | 3.19(5)   | 164.4 |                                                            |          |       |           |       |
| C3-H3B...F28 <sup>c</sup>                                  | 2.911(6)  | 115.5 | 2.915(8)  | 112.6 | C25-H25C...F1 <sup>h</sup>                                 | 2.937(6) | 118.9 | 2.972(8)  | 112.8 |
| C12-H12A...F20                                             | 3.229(11) | 125.1 | 3.258(11) | 126.7 | C25-H25A...F22                                             | 2.990(6) | 127.3 | 3.003(10) | 123.7 |
| C12-H12B...F8                                              | 2.962(6)  | 118.2 | 2.948(8)  | 119.9 | C28-H28B...F14                                             | 3.044(6) | 132.8 | 2.942(12) | 118.8 |
|                                                            |           |       |           |       | C28-H28B...F13A                                            | -        | -     | 3.093(10) | 136.9 |



|                                                                                                                       | 80 K                  |                | 200 K                  |                |                                                                                                                           | 80 K                 |                | 200 K                |                |
|-----------------------------------------------------------------------------------------------------------------------|-----------------------|----------------|------------------------|----------------|---------------------------------------------------------------------------------------------------------------------------|----------------------|----------------|----------------------|----------------|
| <b>Donor - CH<sub>2</sub> from 1ditz bridging Fe1 and Fe4</b>                                                         | d(D···A)              | <DHA           | d(D···A)               | <DHA           | <b>Donor - CH<sub>2</sub> from 1ditz bridging Fe3 and Fe4</b>                                                             | d(D···A)             | <DHA           | d(D···A)             | <DHA           |
| C6-H6A...N78 <sup>a</sup> (dinitrile coordinated to Fe4)                                                              | 3.449(7)              | 143.6          | 3.504(11)              | 144.5          | C41-H41B...N76 <sup>f</sup> (dinitrile coordinated to Fe3)<br>C41-H41B...N76A <sup>f</sup> (dinitrile coordinated to Fe3) | 3.346(8)             | 163.8          | 3.410(3)<br>3.28(6)  | 150.3<br>166.5 |
| C9-H9B...N54 <sup>e</sup> (dinitrile coordinated to Fe2)<br>C9-H9B...N54A <sup>e</sup> (dinitrile coordinated to Fe2) | 3.137(16)<br>3.38(3)  | 144.0<br>135.2 | 3.248(12)<br>-         | 141.1<br>-     | C41-H41A...F18<br>C41-H41A...F18A                                                                                         | 3.303(13)            | 139.4          | 3.224(11)<br>3.13(3) | 132.2<br>124.4 |
| C6-H6B...F23 <sup>d</sup><br>C6-H6B...F23A <sup>d</sup>                                                               | 3.182(6)<br>-         | 133.6<br>-     | 3.213(11)<br>3.06(5)   | 135.9<br>132.7 | C44-H44B...F31                                                                                                            | 2.951(7)             | 115.7          | 3.098(13)            | 130.5          |
| C9-H9A...F11<br>C9-H9A...F11A                                                                                         | 3.216(6)<br>3.043(15) | 128.3<br>136.9 | 3.313(10)<br>3.20(3)   | 127.2<br>132.7 |                                                                                                                           |                      |                |                      |                |
|                                                                                                                       | 80 K                  |                | 200 K                  |                |                                                                                                                           | 80 K                 |                | 200 K                |                |
| <b>Fe2</b>                                                                                                            | d(D···A)              | <DHA           | d(D···A)               | <DHA           | <b>Fe4</b>                                                                                                                | d(D···A)             | <DHA           | d(D···A)             | <DHA           |
| <b>Donor – tetrazole ring linked to Fe2</b>                                                                           |                       |                |                        |                | <b>Donor – tetrazole ring linked to Fe4</b>                                                                               |                      |                |                      |                |
| C11-H11...N80 <sup>g</sup> (dinitrile coordinated to Fe4)                                                             | 3.233(7)              | 153.5          | 3.277(11)              | 157.7          | C8-H8...N54 <sup>e</sup> (dinitrile coordinated to Fe2)<br>C8-H8...N54A <sup>e</sup> (dinitrile coordinated to Fe2)       | 3.204(14)<br>3.40(3) | 126.3<br>135.4 | 3.299(12)<br>-       | 133.1<br>-     |
| C26-H26...N74 <sup>a</sup> (dinitrile coordinated to Fe3)                                                             | 3.390(7)              | 140.5          | 3.453(11)              | 139.6          | C5-H5...N85 (noncoordinated dinitrile)                                                                                    | 3.322(7)             | 166.5          | 3.342(10)            | 166.5          |
| C2-H2...N88 <sup>a</sup> (noncoordinated dinitrile)<br>C2-H2...N88A <sup>a</sup> (noncoordinated dinitrile)           | 3.24(2)<br>3.27(2)    | 147.6<br>158.7 | 3.300(3)<br>3.31(5)    | 153.7<br>160.2 | C43-H43...N87 <sup>i</sup> (noncoordinated dinitrile)<br>C43-H43...N87A <sup>i</sup> (noncoordinated dinitrile)           | 3.310(3)<br>3.18(5)  | 163.8<br>166.2 | 3.240(2)<br>3.35(7)  | 166.7<br>161.8 |
| C23-H23A...N86 <sup>h</sup> (noncoordinated dinitrile)                                                                | 3.240(7)              | 148.7          | 3.296(10)              | 147.6          |                                                                                                                           |                      |                |                      |                |
| <b>Donor - dinitrile coordinated to Fe2</b>                                                                           |                       |                |                        |                | <b>Donor - dinitrile coordinated to Fe4</b>                                                                               |                      |                |                      |                |
| C30-H30B...N62 <sup>a</sup> (Tz coordinated to Fe4)                                                                   | 3.406(7)              | 133.2          | 3.416(10)              | 134.3          | C56-H56A...N2 <sup>a</sup> (Tz coordinated to Fe1)                                                                        | 3.143(8)             | 123.9          | 3.163(10)            | 125.8          |
| C32-H32B...N74 <sup>a</sup> (dinitrile coordinated to Fe3)                                                            | 3.166(8)              | 112.9          | 3.223(13)              | 114.3          | C58-H58B...N15 <sup>h</sup> (Tz coordinated to Fe4)                                                                       | 3.494(9)             | 145.2          | 3.535(10)            | 138.7          |
| C35-H35A...N22 <sup>b</sup> (Tz coordinated to Fe4)                                                                   | 3.164(7)              | 128.9          | 3.194(13)              | 134.0          | C56-H56A...N88A                                                                                                           | -                    | -              | 3.17(4)              | 123.2          |
| C37-H37A...N7 <sup>h</sup> (Tz coordinated to Fe2)                                                                    | 3.461(7)              | 151.3          | 3.475(10)              | 161.2          | C61-H61A...N85 <sup>h</sup> (noncoordinated dinitrile)                                                                    | 3.379(8)             | 126.8          | 3.345(13)            | 130.2          |
| C39-H39...N84 <sup>f</sup> (noncoordinated dinitrile)                                                                 | 3.212(7)              | 162.1          | 3.267(11)              | 163.6          | C61-H61B...N86 <sup>f</sup> (noncoordinated dinitrile)                                                                    | 3.372(9)             | 122.9          | 3.408(15)            | 118.1          |
| C35-H35B...N86 <sup>h</sup> (noncoordinated dinitrile)                                                                | 3.451(8)              | 137.3          | 3.490(2)               | 144.7          | C58-H58B...F5 <sup>h</sup>                                                                                                | 3.337(8)             | 135.8          | 3.434(11)            | 138.7          |
| C31-H31A...F16 <sup>e</sup><br>C31-H31A...F16A <sup>e</sup>                                                           | -<br>-                | -<br>-         | 3.127(16)<br>3.423(14) | 127.4<br>162.4 | C62-H62A...F20A <sup>g</sup>                                                                                              | 3.23(2)              | 154.6          | -                    | -              |
| C36-H36B...F29 <sup>g</sup>                                                                                           | 3.126(10)             | 139.2          | 3.447(19)              | 133.6          | C63-H63B...F13 <sup>l</sup>                                                                                               | 3.388(9)             | 142.3          | 3.790(2)             | 146.8          |

|                                                            | 80 K      |       | 200 K     |       |
|------------------------------------------------------------|-----------|-------|-----------|-------|
|                                                            | d(D...A)  | <DHA  | d(D...A)  | <DHA  |
| <b>Donor - noncoordinated dinitriles</b>                   |           |       |           |       |
| C66-H66A...N26 (Tz coordinated to Fe1)                     | 3.003(11) | 118.3 | 3.214(18) | 127.3 |
| C71-H71C...N34 <sup>f</sup> (dinitrile coordinated to Fe1) | 3.401(10) | 120.9 | 3.040(3)  | 129.5 |
| C78-H78A...N70 <sup>f</sup> (Tz coordinated to Fe4)        | 3.167(8)  | 123.1 | 3.201(12) | 120.2 |
| C83-H83A...N54 <sup>m</sup> (dinitrile coordinated to Fe2) | -         | -     | 3.420(7)  | 130.5 |
| C67-H67A...F11A <sup>b</sup>                               | -         | -     | 3.25(3)   | 141.5 |
| C68-H68A...F9                                              | 3.298(14) | 121.7 | 3.226(15) | 137.4 |
| C76-H76A...F21 <sup>f</sup>                                | 3.245(7)  | 129.1 | 3.244(12) | 125.7 |
| C77-H77A...F23 <sup>d</sup>                                | 3.406(7)  | 132.0 | 3.426(14) | 137.9 |
| C78-H78B...F24A <sup>f</sup>                               | -         | -     | 3.29(5)   | 148.3 |
| C81-H81A...F31                                             | 3.349(15) | 130.5 | 3.410(3)  | 147.0 |

<sup>a</sup> -x,1-y,1-z; <sup>b</sup> 1-x,2-y,1-z; <sup>c</sup> x,1+y,-1+z; <sup>d</sup> x,y,-1+z; <sup>e</sup> -x,2-y,1-z; <sup>f</sup> 1-x,1-y,1-z; <sup>g</sup> 1-x,1-y,2-z; <sup>h</sup> x,y,1+z; <sup>i</sup> -x,-y,2-z; <sup>j</sup> -1+x,y,z; <sup>k</sup> x,-1+y,z; <sup>l</sup> x,-1+y,1+z; <sup>m</sup> -x,1-y,2-z.

**Table S8b.** Amount of interatomic contacts for **3** (involving 1ditz and GLN as donor (DH) and acceptor (A)) at 80 K, 200 K related to the Fe1, Fe2, Fe3 and Fe4 surroundings.

|            | DH   |       | A    |       | IN TOTAL |       |
|------------|------|-------|------|-------|----------|-------|
|            | 80 K | 200 K | 80 K | 200 K | 80 K     | 200 K |
| <b>Fe1</b> | 6    | 8     | 10   | 10    | 16       | 18    |
| <b>Fe2</b> | 11   | 12    | 5    | 8     | 15       | 19    |
| <b>Fe3</b> | 16   | 14    | 5    | 5     | 19       | 18    |
| <b>Fe4</b> | 10   | 8     | 7    | 5     | 16       | 13    |

**Table S9.** Selected C-H...N and C-H...F interatomic contacts [ $\text{\AA}$ ] and angles [ $^\circ$ ] for **4** (1ditz/SUN) at 100 K and 200 K. D-H...A distances longer than 3.5  $\text{\AA}$  and angles lesser than 110 $^\circ$  were included only for facilitate comparison of changes.

|                             | 100 K<br>[4]<br>1ditz/SUN |       | 200 K<br>[4]<br>1ditz/SUN |       |
|-----------------------------|---------------------------|-------|---------------------------|-------|
|                             | d(D..A)                   | <DHA  | d(D..A)                   | <DHA  |
| C1-H1...N20                 | 3.393(2)                  | 146.4 | 3.394(3)                  | 151.1 |
| C3-H3A...F1                 | 3.303(6)                  | 125.7 | 3.279(7)                  | 125.1 |
| C5-H5...N19 <sup>b</sup>    | 3.146(2)                  | 138.7 | 3.235(3)                  | 141.7 |
| C6-H6A...F3 <sup>c</sup>    | 3.056(6)                  | 127.1 | 3.142(9)                  | 121.6 |
| C6-H6B...F5 <sup>c</sup>    | 2.9774(19)                | 133.9 | 3.041(5)                  | 132.9 |
| C8-H8A...N3 <sup>d</sup>    | 3.1945(19)                | 122.3 | 3.230(2)                  | 127.7 |
| C8-H8B...N20                | 3.443(2)                  | 141.7 | 3.498(3)                  | 136.7 |
| C12-H12A...N20 <sup>a</sup> | 3.498(2)                  | 151.3 | 3.564(3)                  | 148.3 |
| C12-H12B...N19 <sup>b</sup> | 3.216(2)                  | 115.4 | 3.337(3)                  | 118.1 |
| C13-H13B...N14 <sup>a</sup> | 3.288(2)                  | 146.7 | 3.408(2)                  | 147.6 |
| C13-H13B...N15 <sup>a</sup> | 3.380(2)                  | 129.4 | 3.397(2)                  | 129.7 |
| C16-H16B...F4 <sup>e</sup>  | 3.310(12)                 | 145.8 | 3.409(13)                 | 143.1 |

<sup>a</sup> x, 1/2-y, 1/2+z; <sup>b</sup> x, 3/2-y, 1/2+z; <sup>c</sup> x, -1+y, z; <sup>d</sup> x, 1/2-y, -1/2+z; <sup>e</sup> x, 3/2-y, -1/2+z; <sup>f</sup> 1-x, -1/2+y, 1/2-z.

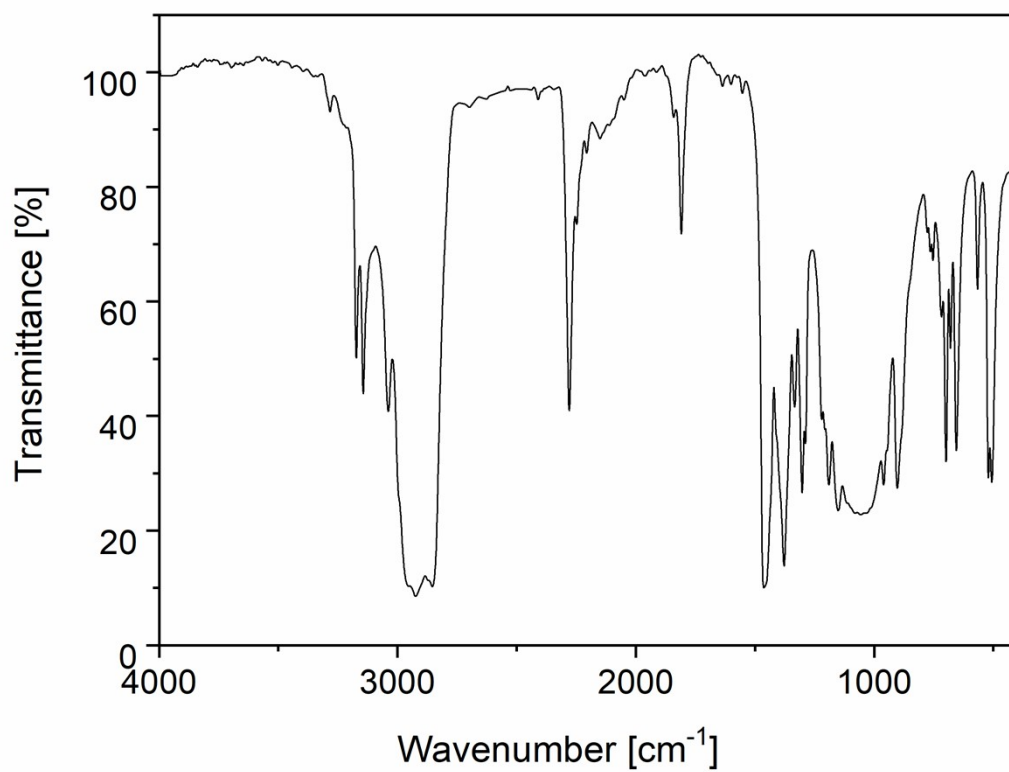

**Figure S1.** FTIR spectrum of **1** (RT).

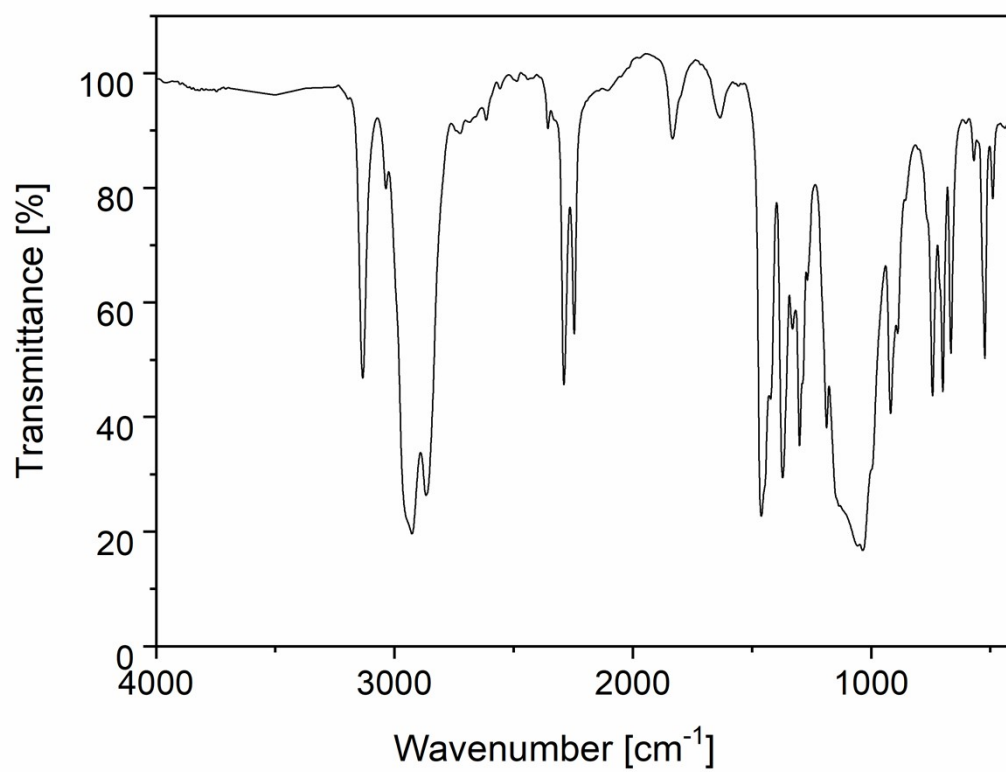

**Figure S2.** FTIR spectrum of **2** (RT).

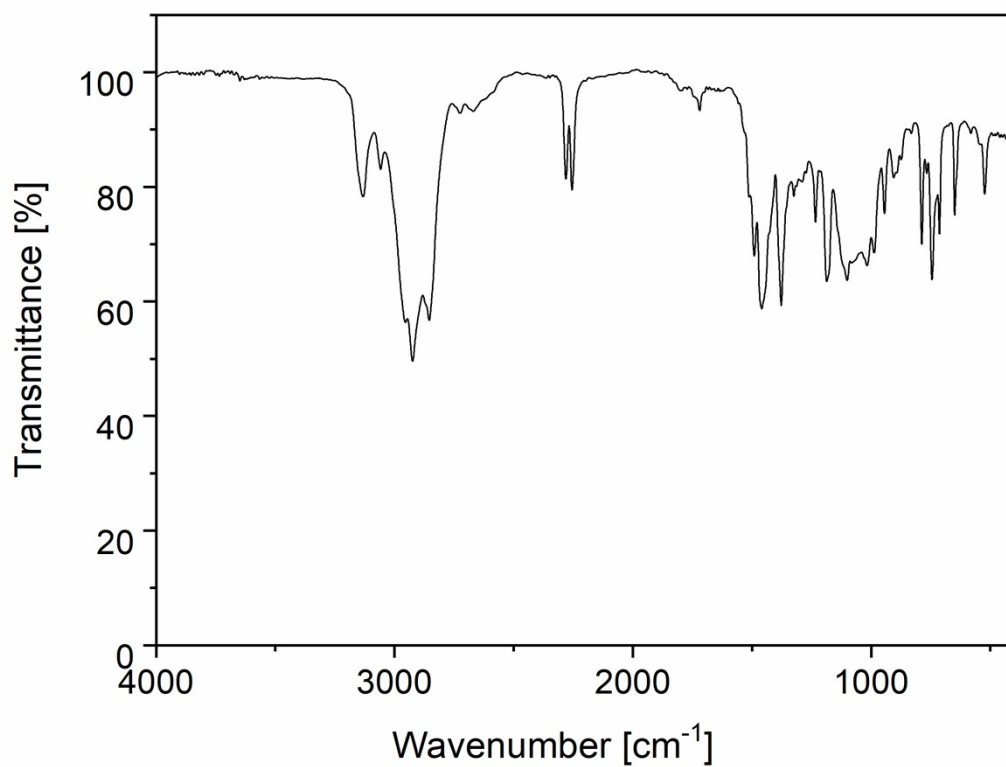

**Figure S3.** FTIR spectrum of **3** (RT).

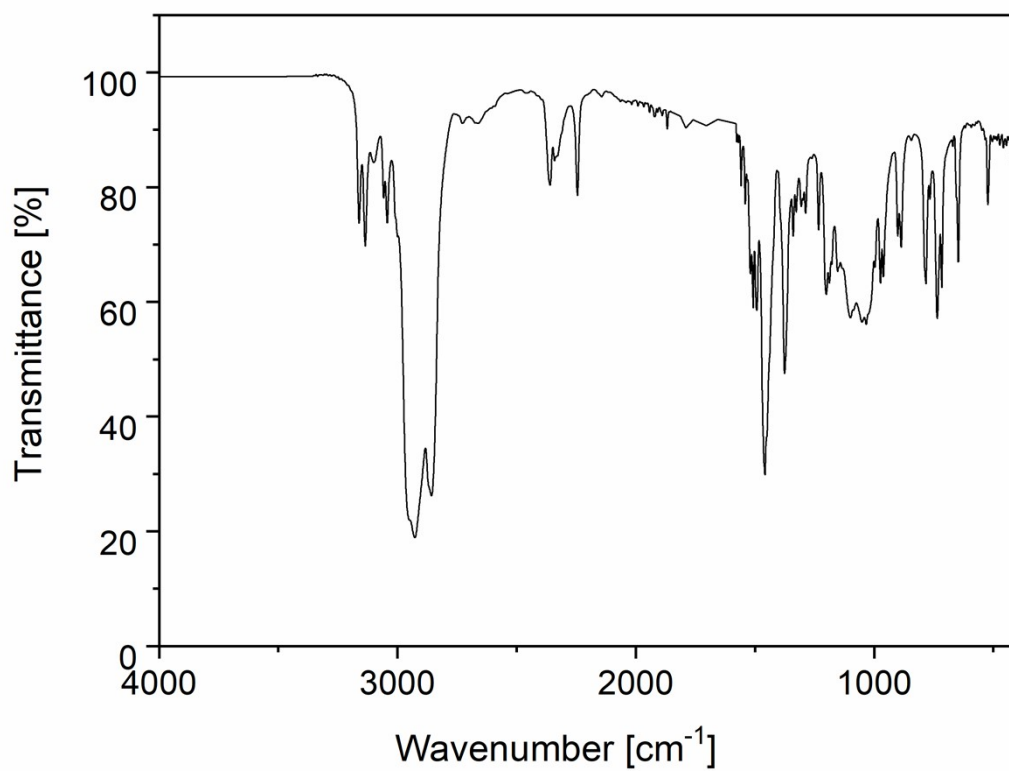

**Figure S4.** FTIR spectrum of **4** (RT).

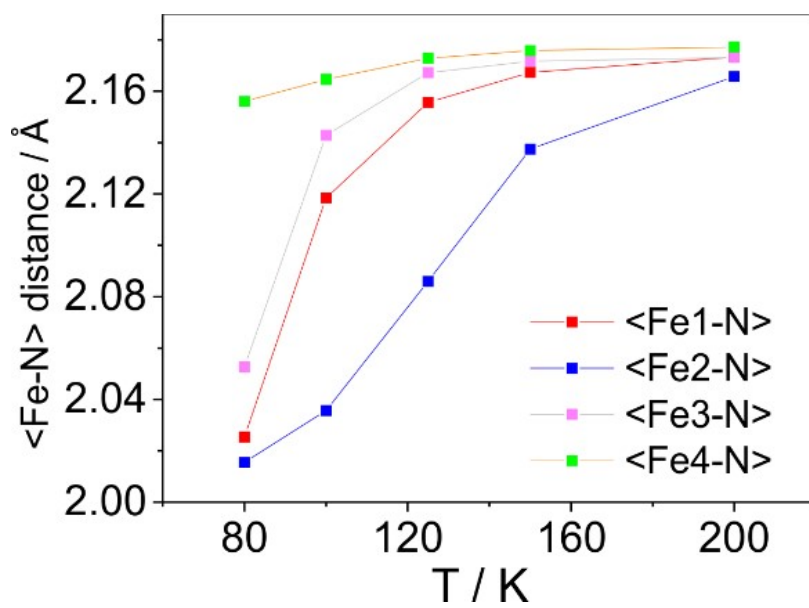

**Figure S5.** Temperature dependence of average <Fe1-N> (red), <Fe2-N> (blue), <Fe3-N> (pink) and <Fe4-N> (green) distances for individual Fe(II) ions in **3**.
